# Supplementary material for: Novel 3DOM BiVO4/TiO2 nanocomposites for highly enhanced photocatalytic activity
Source: Royal Society of Chemistry journal article supplement (doi:10.1039/c5ta00783f), 2015-01-01
Supplement: c5ta00783f1.pdf [file c5ta00783f1.pdf]

## Supporting Information

### Novel 3DOM BiVO<sub>4</sub>/TiO<sub>2</sub> nanocomposites for highly enhanced visible-light photocatalytic activity

Meryam Zalfani,<sup>+ab</sup> Benoit Van der Schueren,<sup>+a</sup> Zhi-Yi Hu,<sup>+c</sup> Joanna C. Rooke,<sup>a</sup> R. Bourguiga,<sup>b</sup>  
Min Wu,<sup>\*d</sup> Yu Li<sup>\*d</sup>, Gustaff Van Tendeloo,<sup>c</sup> and B.-L. Su<sup>\*ade</sup>

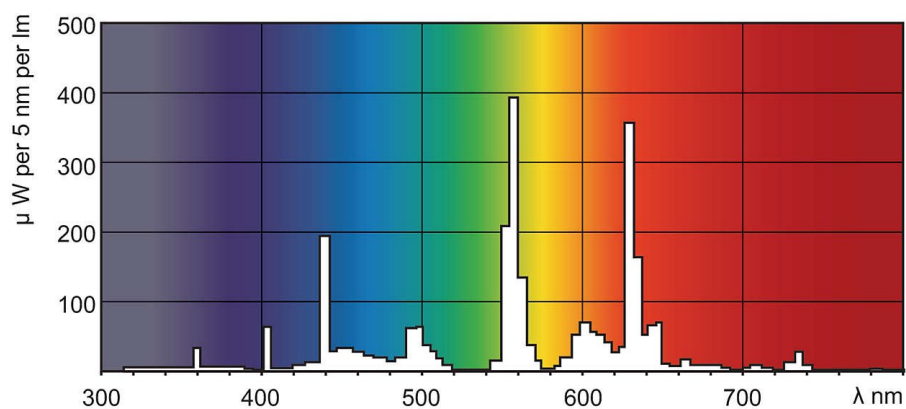

Figure 1S. Emission spectrum of the 18 W neon light lamp for the photocatalytic degradation of RhB

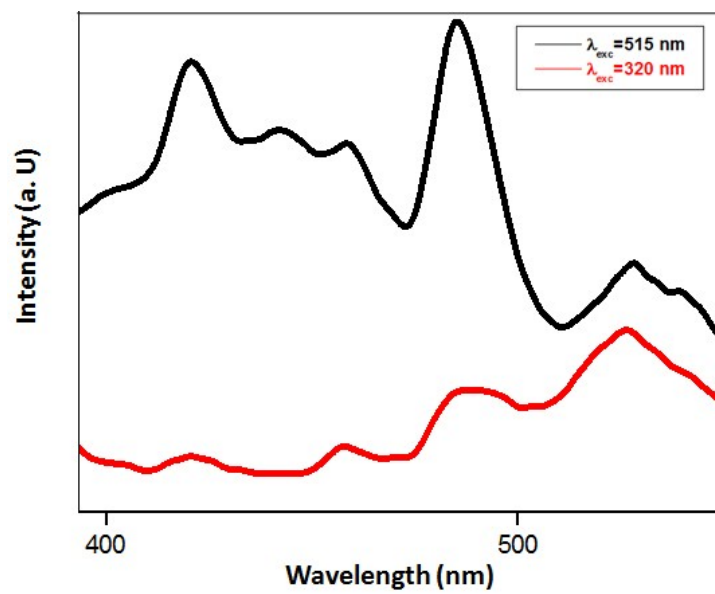

Figure 2S. PL spectra of BiVO<sub>4</sub> nanoparticles at different excitation wavelengths

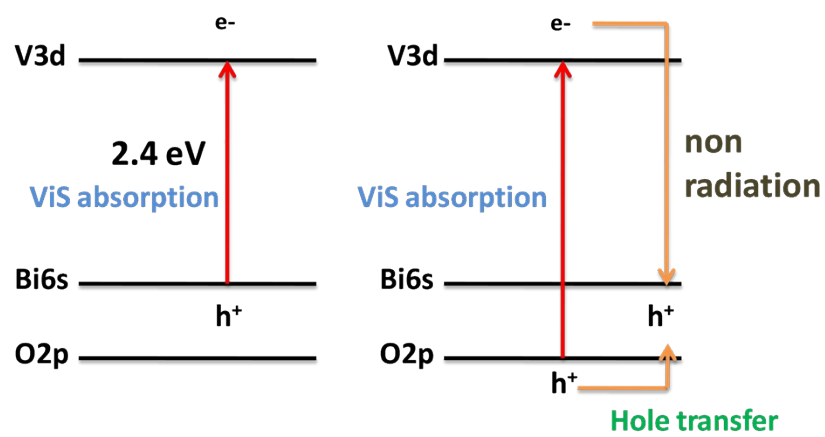

Figure 3S. Illustration of electrons-holes generation and recombination using different excitation wavelengths
